# Supplementary material for: The arrow‐of‐time in neuroimaging time series identifies causal triggers of brain function
Source: PubMed Central journal article supplement (PMC10258533; doi:10.1002/hbm.26331), 2023-05-20
Supplement: HBM-44-4077-s001.pdf [file HBM-44-4077-s001.pdf]

# Supplementary Material - ‘The arrow-of-time in neuroimaging time series identifies causal triggers of brain function’

## 1 Supplementary Results

### 2 Quality of AoT estimation as a function of sample number

3 In the resting state case, each available run contains 1200 time points. AoT strength can thus  
4 be quantified using many more samples than in our main analyses. To verify whether the detected  
5 causal effects would be altered in such a setting, we estimated  $\tau$  at rest using up to 100000 samples  
6 (Fig. 1).

7 As more samples were considered (*i.e.*, moving downward in the top plot), the obtained AoT  
8 pattern was further strengthened, and the involved brain regions remained identical. This was  
9 confirmed by a spatial correlation between successively estimated patterns that already exceeded

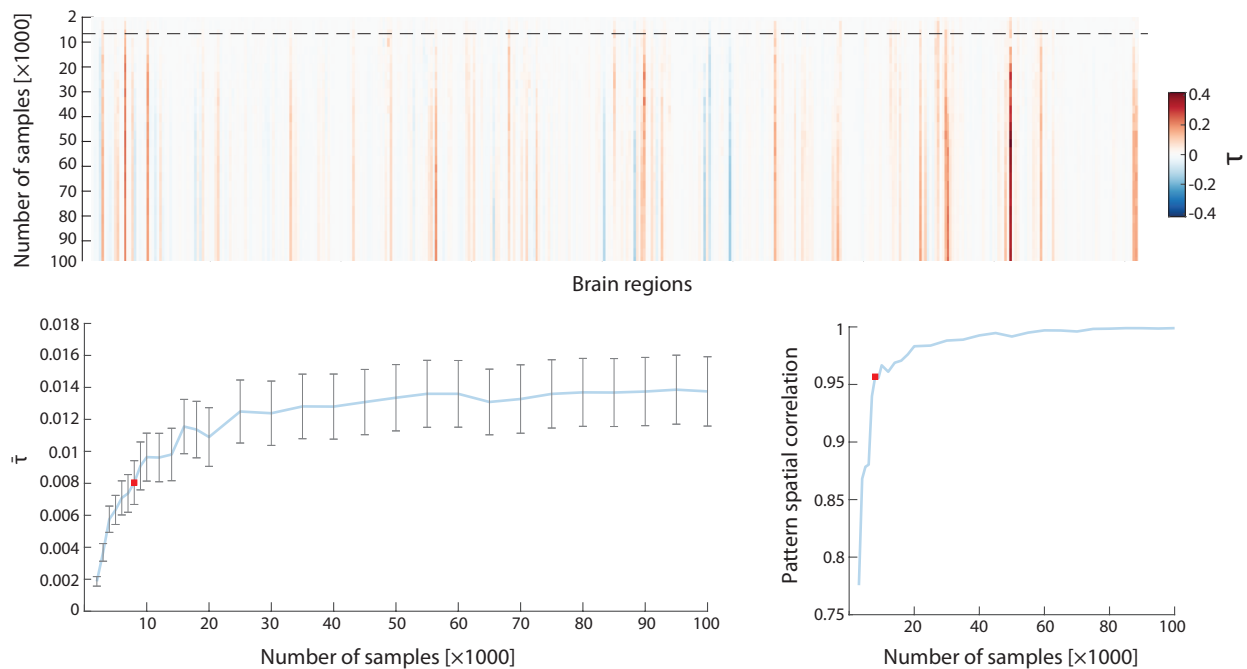

Figure 1: *Top* - Estimation of  $\tau$  in the resting state case when from 2000 to 100000 samples are used (top to bottom in the heatmap), for all brain regions (left to right). *Bottom left* - Convergence of mean AoT across regions ( $\bar{\tau}$ ) as more samples are considered. Error bars denote standard error of the mean. *Bottom right* - Spatial correlation between the AoT patterns obtained using two successive numbers of samples. The estimates reached using  $n_s^* = 8000$  samples (the value selected for our main analyses) are highlighted by a dashed horizontal line (top panel) or a red rectangle (bottom panels).

10 0.95 for  $n_s^* = 8000$  samples (bottom right plot). As could be expected given the strengthening of  
11 the detected causal effects,  $\bar{\tau}$  also continued to moderately increase as further samples were added,  
12 until  $\bar{\tau} \approx 0.013$  (bottom left plot).

13 On task paradigms (Fig. 2), similar observations could be made in terms of pattern strength-  
14 ening and convergence, regardless of the exact task at hand. Thus, using  $n_s^* = 8000$  samples to  
15 estimate AoT strength appears sufficient, regardless of the investigated paradigm, to detect all the  
16 brain regions implicated in causal brain mechanisms.

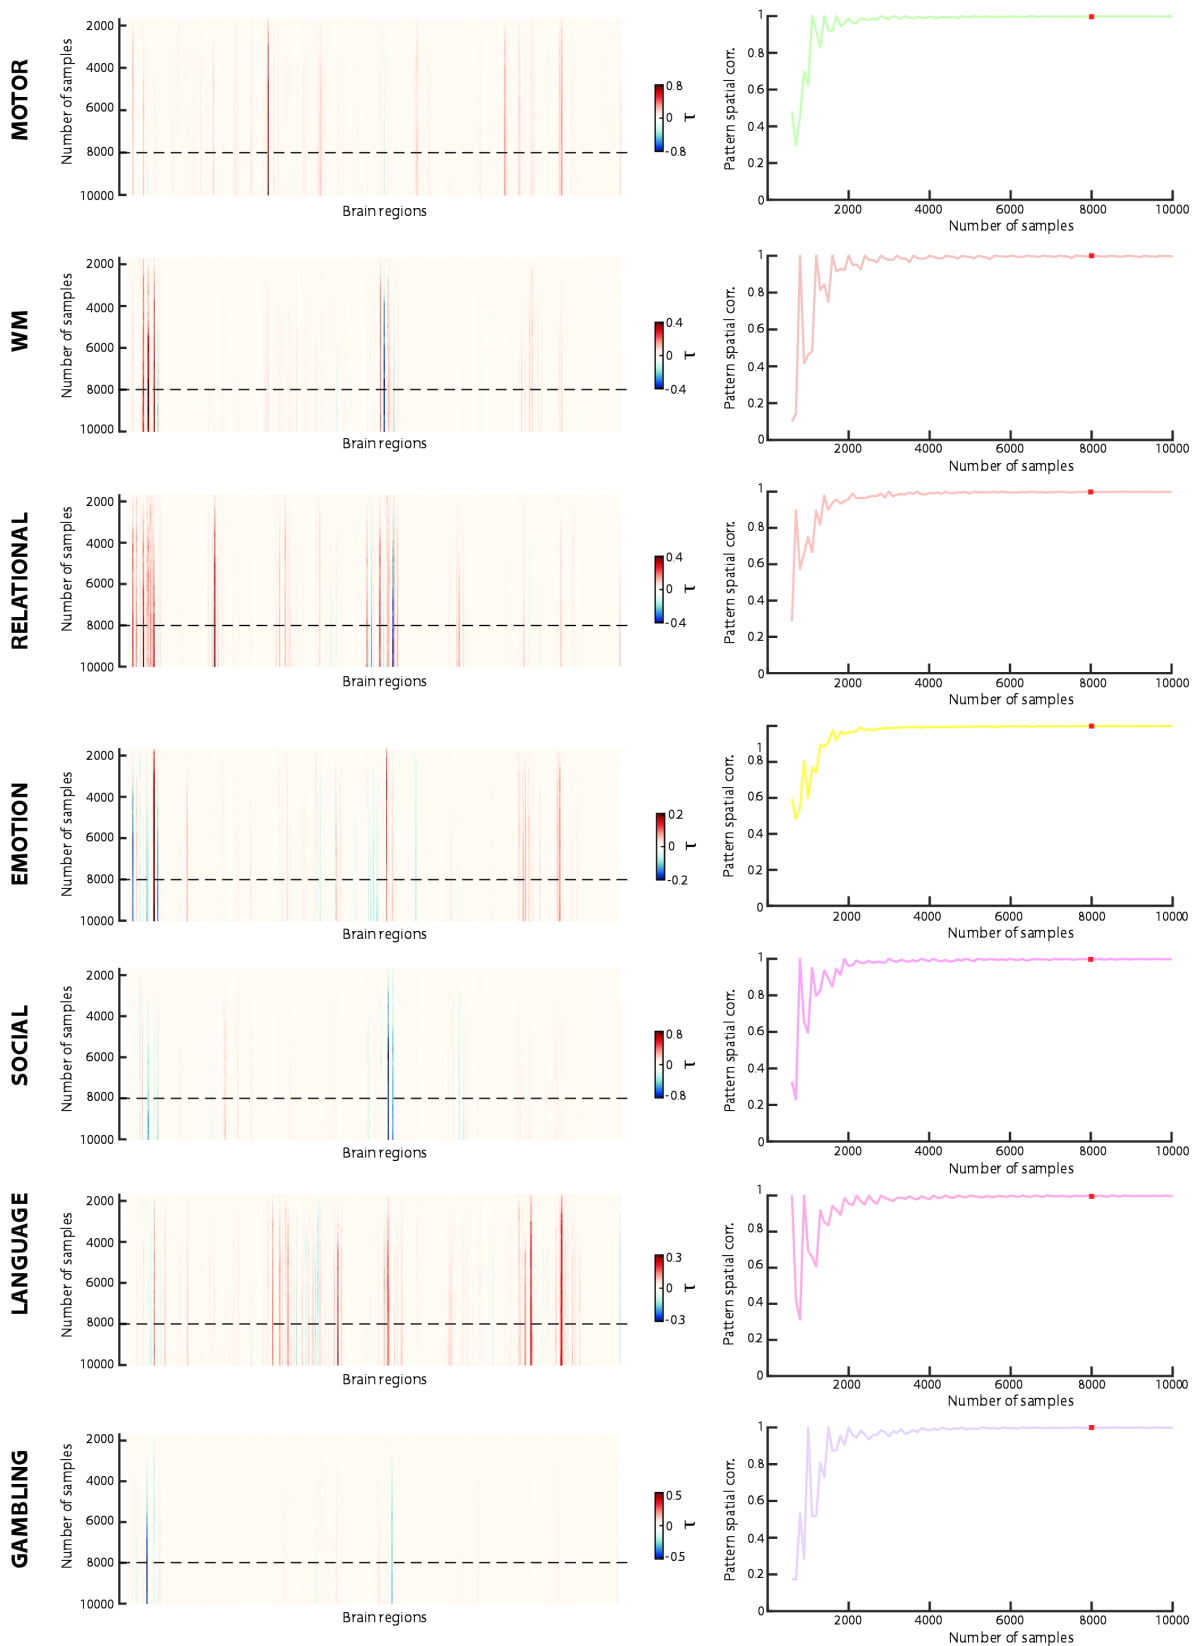

Figure 2: For each task (row of plots), estimation of  $\tau$  when up to 10000 samples are used (top to bottom in the heatmaps), for all brain regions (left to right), and spatial correlation between the AoT patterns obtained using two successive numbers of samples. The estimates reached using  $n_s^* = 8000$  samples (the value selected for our main analyses) are highlighted by a dashed horizontal line (left heatmaps) or a red rectangle (right plots). WM: working memory.

17 *Regional AoT patterns across tasks*

18 Fig. 3 shows the AoT patterns extracted from full task recordings using  $n_s^* = 8000$  samples,  
19 when convergence is already achieved as demonstrated above. Below, drawing from past work<sup>1</sup>,  
20 we first briefly summarize the main components of each task. We then discuss the largest AoT  
21 contributors in terms of how they fit each paradigm’s demands. Since we consider full paradigms,  
22 for which a given area may transit between acting as a causal source or sink over the course of  
23 time, we do not take sign into account in what follows.

24 The working memory task was an  $N$ -back task in which images of faces, tools, places and body  
25 parts were presented to the subjects. Half of the blocks consisted in a 0-back task, and half in a  
26 2-back task.

27 In terms of AoT strength, the most influential areas were largely confined to the occipital  
28 cortex. There were also two anterior frontopolar regions from the right hemisphere (R341, R343),  
29 known to be important in working memory tasks for the manipulation of integrated information<sup>2</sup>.

30 In the relational task, for *relational blocks*, the subjects were simultaneously shown two pairs  
31 of objects, with each object a combination of a shape and a texture. They had to determine which  
32 dimension differed between the top objects, and whether the bottom objects also differed along  
33 that same dimension. In *matching blocks*, they were instead shown two objects at the top of the  
34 screen, one at the bottom, and a word (either "shape" or "texture") in the middle. They had  
35 to determine whether the bottom object matched any of the top ones in terms of the displayed  
36 dimension.

37 Visual regions were the strongest contributors to the AoT pattern. Of all the tasks, this was  
38 the one with the broadest array of significant visual contributions. The intraparietal sulcus (IPS)  
39 was also resolved bilaterally (R73, R75, R282, R286). The IPS plays a role in tracking multiple  
40 objects<sup>3</sup> as well as in short-term memory for multifeature objects<sup>4</sup>, both of which are specifically  
41 important for this task. The left rostrolateral prefrontal cortex (R135) was detected as well, and  
42 contributes to relational integration during reasoning<sup>5</sup>.

43 In the emotion task, in *emotional blocks*, participants were shown one face at the top of the  
44 screen, and two at the bottom. They had to determine which of these two matches the top one.

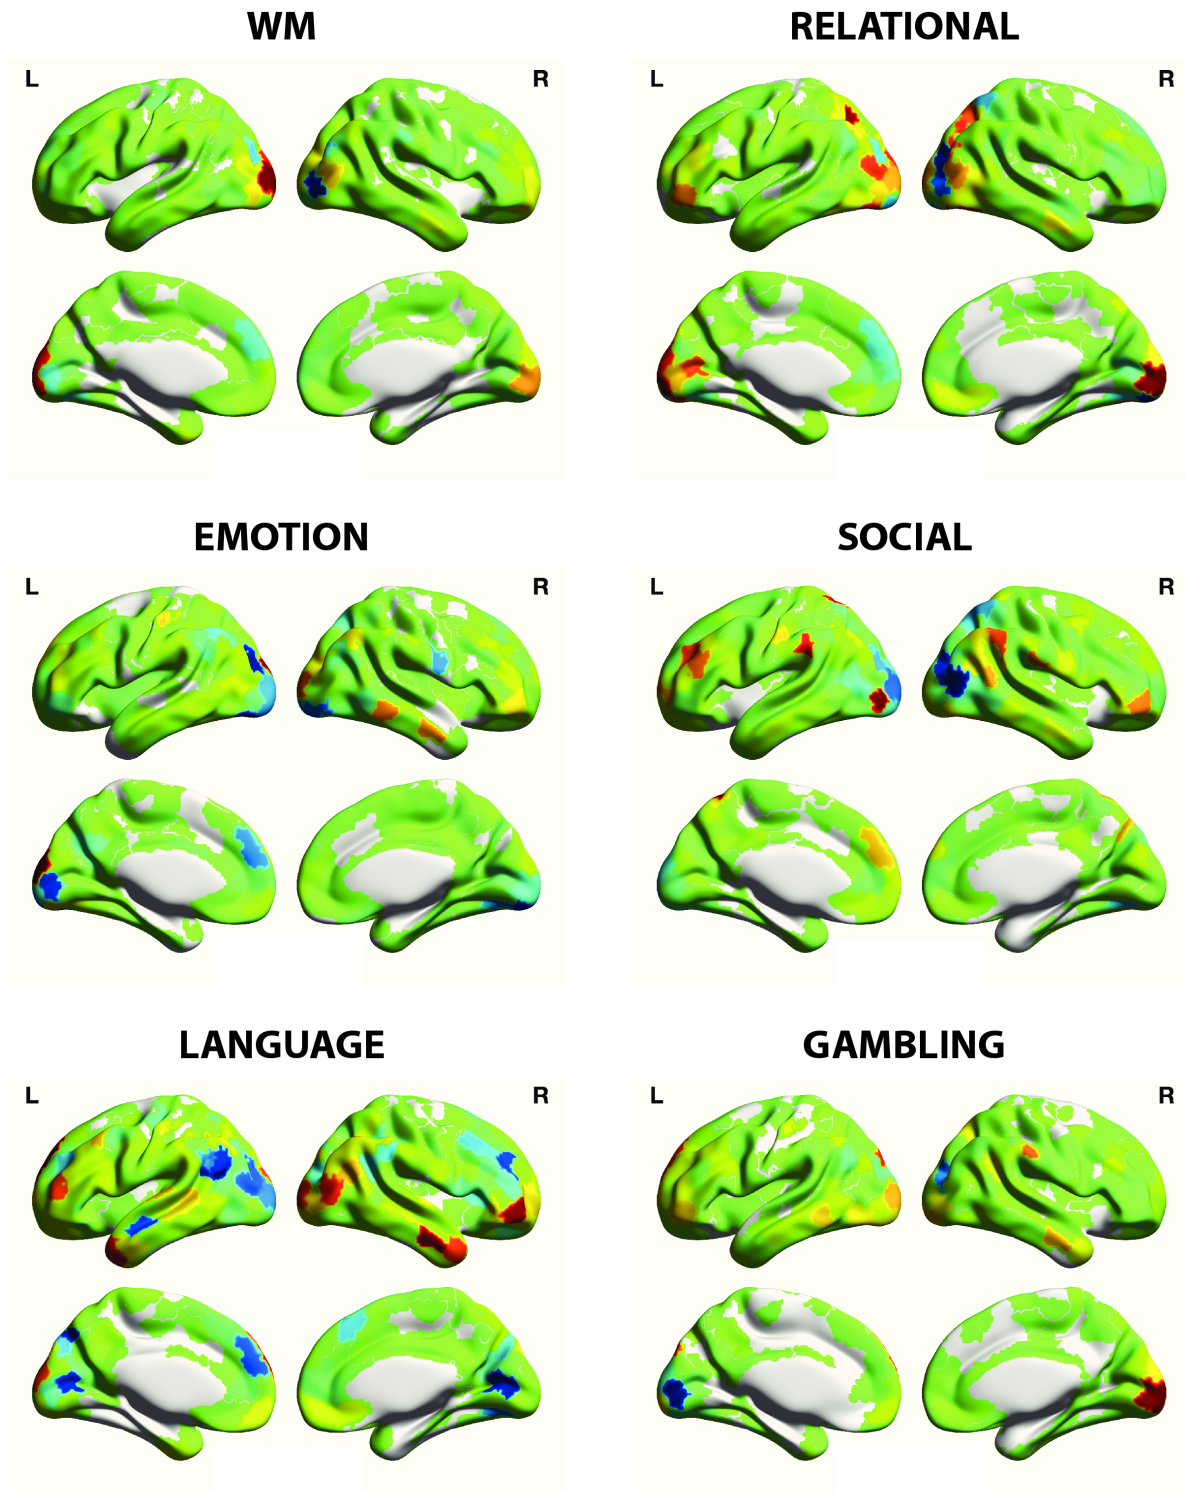

Figure 3: Regional AoT patterns for all tasks (except the motor one, already shown in the main results), considering full time courses and using  $n_s^* = 8000$  samples for estimation. WM: working memory.

45 The faces had either an angry or a fearful expression. In the *shape blocks*, they instead had to  
46 determine which of two bottom shapes matched the top one.

47 AoT strength was overall low in the emotion task, for which the only few notable regions were  
48 part of the visual system.

49 In the social task, participants were shown movie clips of geometrical shapes that either inter-  
50 acted in a certain way (*social blocks*), or moved randomly (*random blocks*). They had to decide  
51 whether the shapes were socially interacting or moving randomly, with the possibility to state that  
52 they were unsure.

53 As in the above cases, the strongest contributors were visual regions. This task was the one  
54 with the second broadest set of influential visual areas. Similarly to the relational task, R282 and  
55 R286 were detected, which makes sense as the social movie clips also involved multiple objects to  
56 track. In addition, an area in the left angular gyrus (R72) previously linked to action awareness  
57 representation<sup>6</sup> was pinpointed, as well as the left supramarginal gyrus (R95), which enables to  
58 retain an abstract representation of serial order information<sup>7</sup>, and the right inferior parietal lobule  
59 (R332), implicated in the discrimination of direction changes<sup>8</sup>.

60 In the language task, participants were stimulated auditorily instead of visually. In *story blocks*,  
61 they were provided with short stories followed by a 2-alternative forced-choice question about the  
62 topic of the story. In the *maths blocks*, they were given a mathematical operation and had to select  
63 the correct answer out of two choices.

64 Fittingly given the auditory nature of stimulation, the language task was the one for which the  
65 fewest visual regions were influential (R24, R221 and R222 only). In addition, several areas linked  
66 to theory of mind (ToM) were resolved, including the left medial prefrontal cortex (R179, involved  
67 in several ToM-related functions<sup>9</sup>) and the bilateral temporal pole (R124, R367 and R368, directly  
68 linked to ToM in story comprehension<sup>10</sup>).

69 In the gambling task, subjects were asked to guess whether the number (between 1 and 9) on a  
70 mystery card would be lower or larger than 5. In the *win blocks*, the outcome would be decided so  
71 as to favour gains, while in the *loss blocks*, it would instead favour losses. Participants eventually  
72 received their total gain as US dollars.

73      Only a restricted set of visual areas were influential in this task.

74      In summary, these observations collectively strengthen our main results (Fig. 3 from the  
75 manuscript) in showing that our AoT-sensitive metric can reveal important brain regions im-  
76 plicated in low-level and high-level brain functions.

77 *Impact of baseline epochs on estimated AoT strength*

78 When baseline epochs were removed from compatible task paradigms (Fig. 4), convergence  
 79 onto a task-specific AoT pattern was still observed from  $\approx 2000$  samples. For the motor, emotion  
 80 and social tasks, asymptotic  $\bar{\tau}$  values increased in magnitude compared to their respective full run  
 81 counterparts (compare to Fig. 2 from the main results), while for the language task, there was no  
 82 major change, and for the working memory task, there was a switch to negative values.

83 The pinpointed regional pattern without baseline epochs remained overall similar for the motor

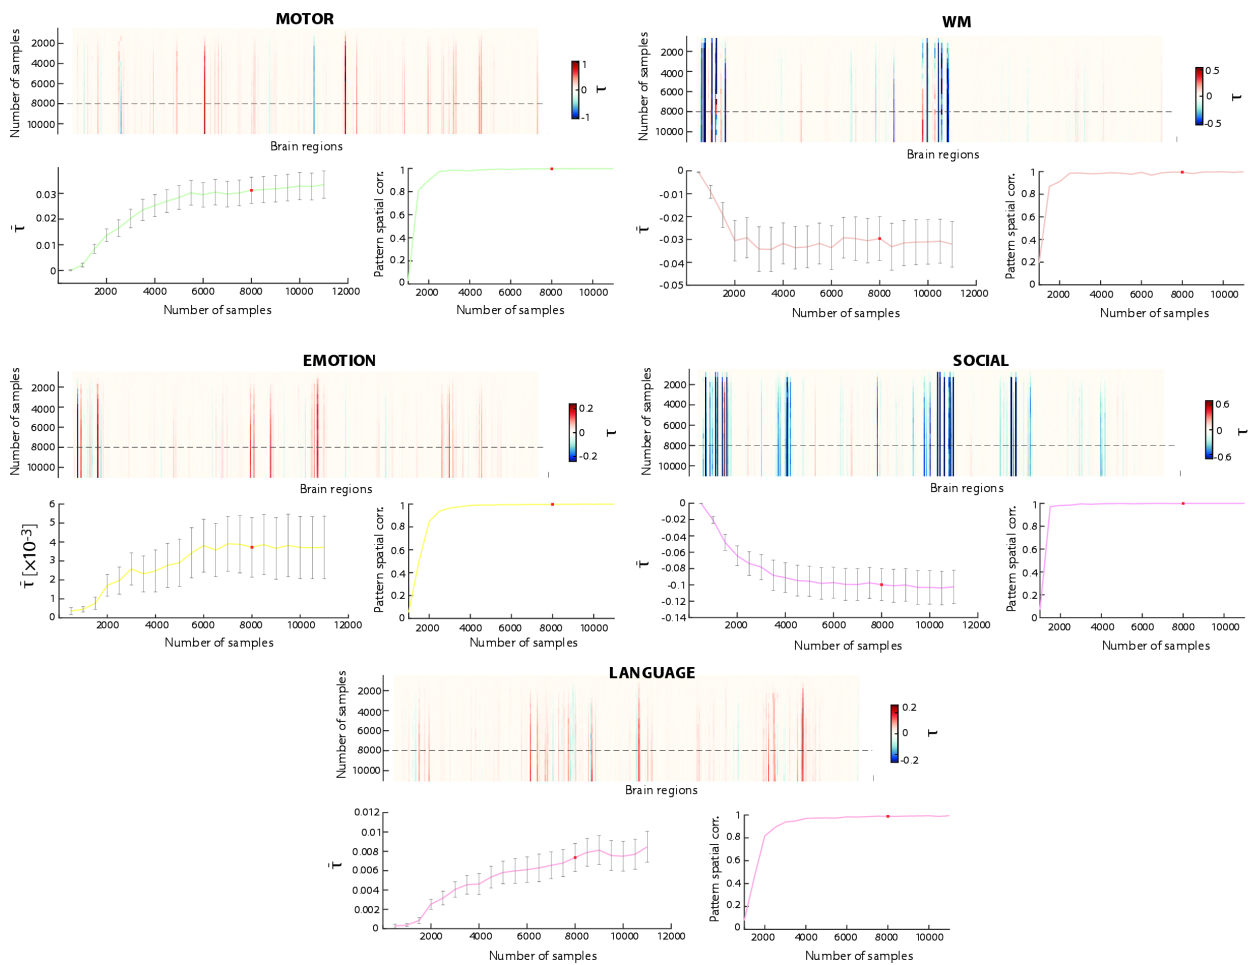

Figure 4: For each task, estimation of  $\tau$  when up to 10000 samples are used (top to bottom in the heatmaps), for all brain regions (left to right); convergence of mean AoT across regions ( $\bar{\tau}$ ) as more samples are considered (with error bars reflecting standard error of the mean); and spatial correlation between the AoT patterns obtained using two successive numbers of samples. The estimates reached using  $n_s^* = 8000$  samples (the value selected for main analyses) are highlighted by a dashed horizontal line (top heatmaps) or a red rectangle (bottom plots). WM: working memory.



84 and emotion tasks, to the exception of some areas which switched sign (positive to negative  $\tau$  in  
85 the former case, and negative to positive  $\tau$  in the latter case). This may be because their role as  
86 causal source or sink fluctuates as a function of epoch type.

87 A marked transition to negative-valued  $\tau$  was seen in the working memory and social task  
88 cases, particularly for visual areas. The working memory task was specifically designed to probe  
89 visual function on top of working memory. Similarly, the social task involves particularly salient  
90 visual stimulation in the form of moving geometric shapes. Negative-valued  $\tau$  when focusing on  
91 task epochs highlights that during such a condition, visual regions behave as strong causal sources,  
92 transmitting information to the rest of the brain.

93 For the language task, changes upon removing baseline epochs were minimal. Interestingly, as  
94 this is the only task that does not rely on visual stimulation, the changes observed for other tasks  
95 are likely largely modulated by the involvement of the visual network.

96 *Null AoT distributions are similar across paradigms*

97 In Fig. 2 (main results), the distributions of  $\tau$  values across regions were shown for all paradigms,  
98 and compared to surrogate values derived from one realization of an amplitude-adjusted phase  
99 randomization process<sup>11</sup>. For the sake of conciseness, null data were only shown when generated  
100 from resting state time courses. Here, we wish to confirm that null distributions are in fact  
101 extremely similar regardless of the distorted input data (*i.e.*, resting state or any of the task  
102 paradigms).

103 The distribution of  $\tau$  values across regions following amplitude-adjusted phase randomization  
104 is shown in Fig. 5, for 15 concatenated null realizations, in the resting state case, for the motor  
105 task with or without including baseline epochs, and for the other 6 tasks. In all cases, the median  
106 (horizontal line) and the mean (empty rectangle) both remained almost equal to zero, and the  
107 range of taken values was similar. This confirms that our main results capture significant causal  
108 effects in all the investigated paradigms. Note that the range of values is larger here than in Fig. 2  
109 (main results) because in the latter case, the results were only displayed for one null realization  
110 instead of 15.

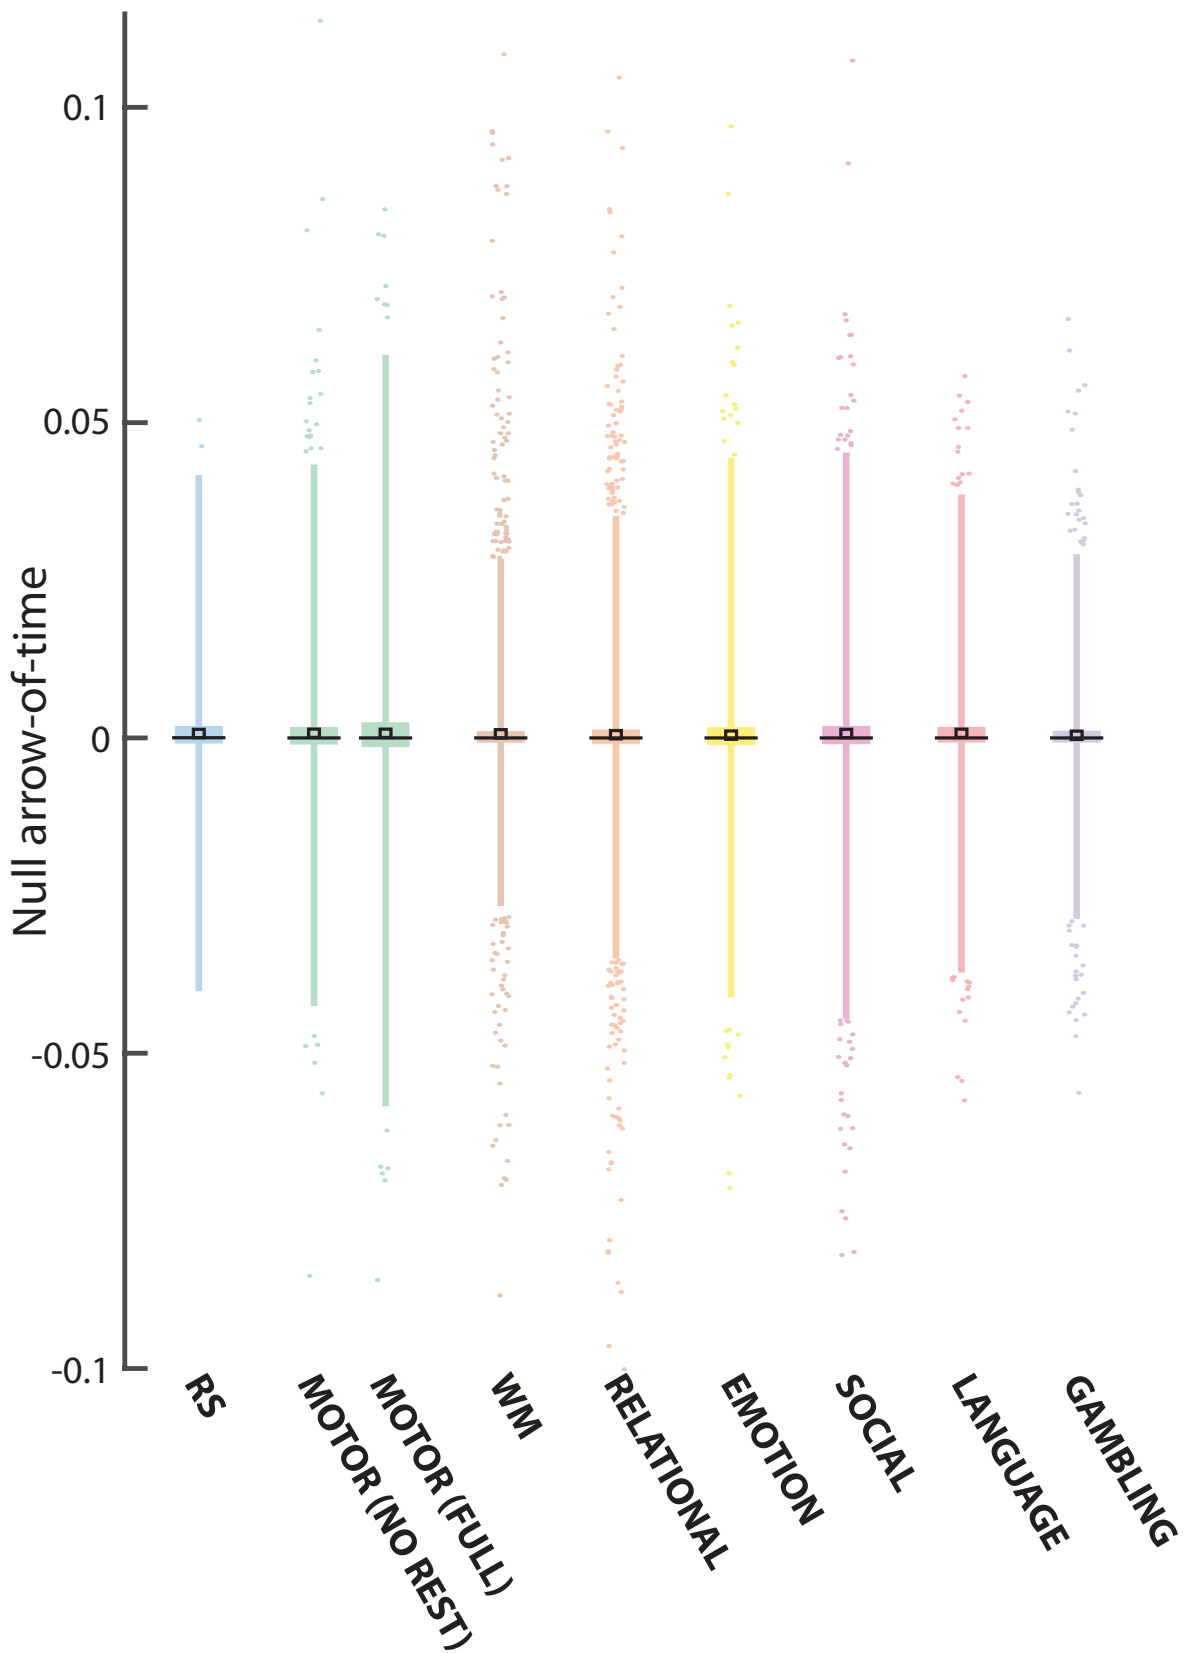

Figure 5: For the resting state (blue), motor (green, with/without baseline epochs on the left/right) and other task paradigms (color coding as in Fig. 2 from our main results), distribution of null  $\tau$  values across regions and 15 null realizations. Note that data points are drawn as outliers if they are larger than  $Q_3 + 15 \cdot (Q_3 - Q_1)$  or smaller than  $Q_1 - 15 \cdot (Q_3 - Q_1)$ , with  $Q_1$  and  $Q_3$  the 25<sup>th</sup> and 75<sup>th</sup> percentiles, respectively. RS: resting state, WM: working memory.

111 *Dynamic evolution of AoT across tasks*

112 To complement Fig. 4 (main results) in which we focused on the motor task, we provide below  
113 similar visualizations of causal effects over time for the other compatible task paradigms. Fur-  
114 thermore, we briefly survey the most involved areas in each case (as quantified from the sum of  
115 absolute-valued AoT strengths across time), more specifically visualize them (see Fig. 11), and link  
116 them to the paradigm at hand.

117 The most dynamic regions regarding AoT strength for the working memory task were primarily  
118 visual (17 out of the top 20). There was also a prefrontal region from the default mode network  
119 (R178), as well as two lateral prefrontal areas (R342 and R345) from the control network. Interest-  
120 ingly, these two latter areas are spatially close, but nonetheless distinct from the ones pinpointed  
121 by static analysis. Furthermore, there has been evidence for their involvement not only in the  
122 context of fluid reasoning<sup>12</sup>, but also specifically regarding temporal dynamics of visual working  
123 memory<sup>13</sup>. It could thus be that some lateral prefrontal regions regulate slow-paced aspects of  
124 working memory, while others instead control temporally more localized aspects.

125 In the relational task, 17 of the top 20 most dynamic areas AoT-wise were from the visual  
126 network, in line with the large representation of the visual network in static findings. R75 and R282  
127 from the IPS were two of the remaining three, also squaring well with previous static observations.  
128 Similarly to the working memory task, R178 was also pinpointed as a highly dynamic area.

129 In the emotion task, 14 of the top 20 largest contributors to dynamic fluctuations in AoT  
130 strength belonged to the visual network. In addition, R165 from the parietal default mode network  
131 was retrieved; fittingly with the task's demands, this area's activity was reported in cases of visual  
132 perceptual priming<sup>14</sup> and of extended decision making<sup>15</sup>. R342 (also found in the working memory  
133 task) and R178 (also found in both the working memory and relational tasks) were additionally  
134 pinpointed regions; their involvement across multiple cognitively demanding tasks may imply that  
135 they are in charge of dynamically regulating more global functions linked to executive processing,  
136 fitting with their prefrontal location in the brain. In addition, another found area was R161  
137 (parietal default mode network), whose dynamic tracking of emotional stimuli was previously  
138 shown to be disrupted in anxiety and depression<sup>16</sup>.

139 During the social task, 16 of the main regions belonged to the visual network. The other four  
140 were from the posterior dorsal attentional network: R81, R84, R282 and R286. The last two were  
141 also detected upon static investigations, and relate to object tracking. The first two are their left  
142 hemispheric counterparts.

143 During the language task, which did not rely on visual stimulation, only 2 of the 20 top dynamic  
144 contributors belonged to the visual network. 9 regions belonged to the control network (4 prefrontal,  
145 3 parietal and 2 within the precuneus), and 7 to the default mode network (3 temporal, 2 parietal  
146 and 2 prefrontal). There were also one limbic (temporal) area and one salience (prefrontal) region.  
147 All ToM-related areas unraveled upon static analysis were also seen here. In control regions, R342  
148 (implicated in mental travels<sup>17</sup>), R343 (in advanced mentalizing skills<sup>18</sup>) and R356 (in emotional  
149 and cognitive processing of narratives<sup>19</sup>) were amongst the strongest contributors.

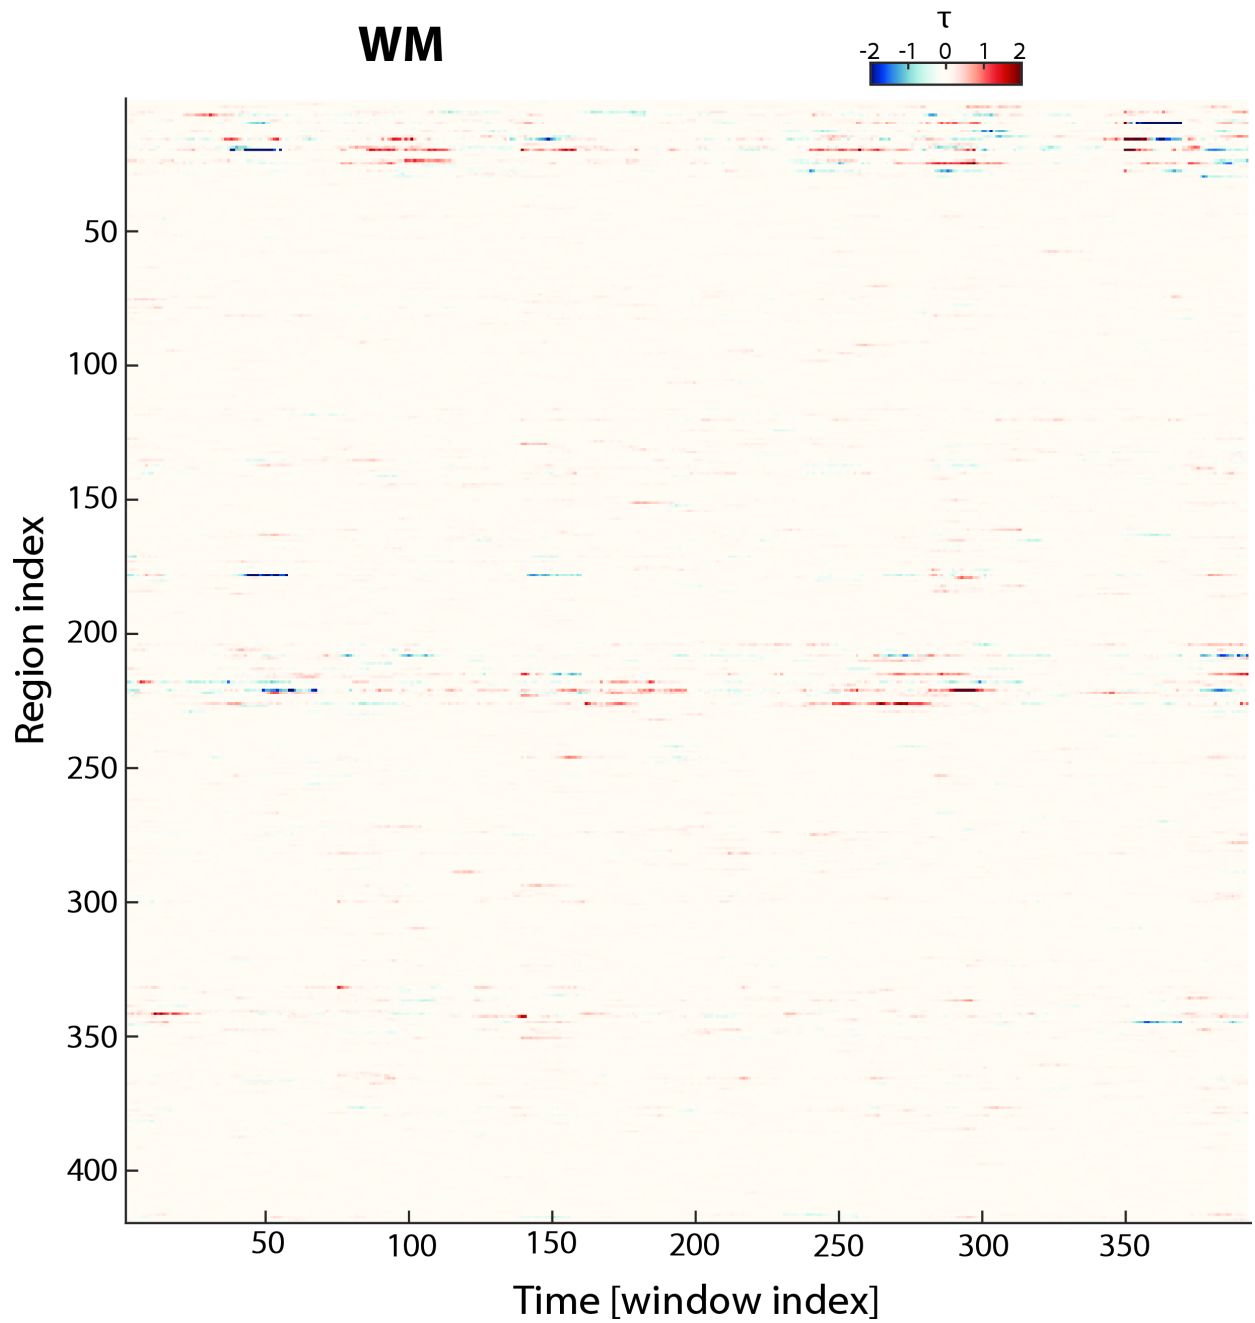

Figure 6: Evolution of causal effects during the working memory task. WM: working memory.

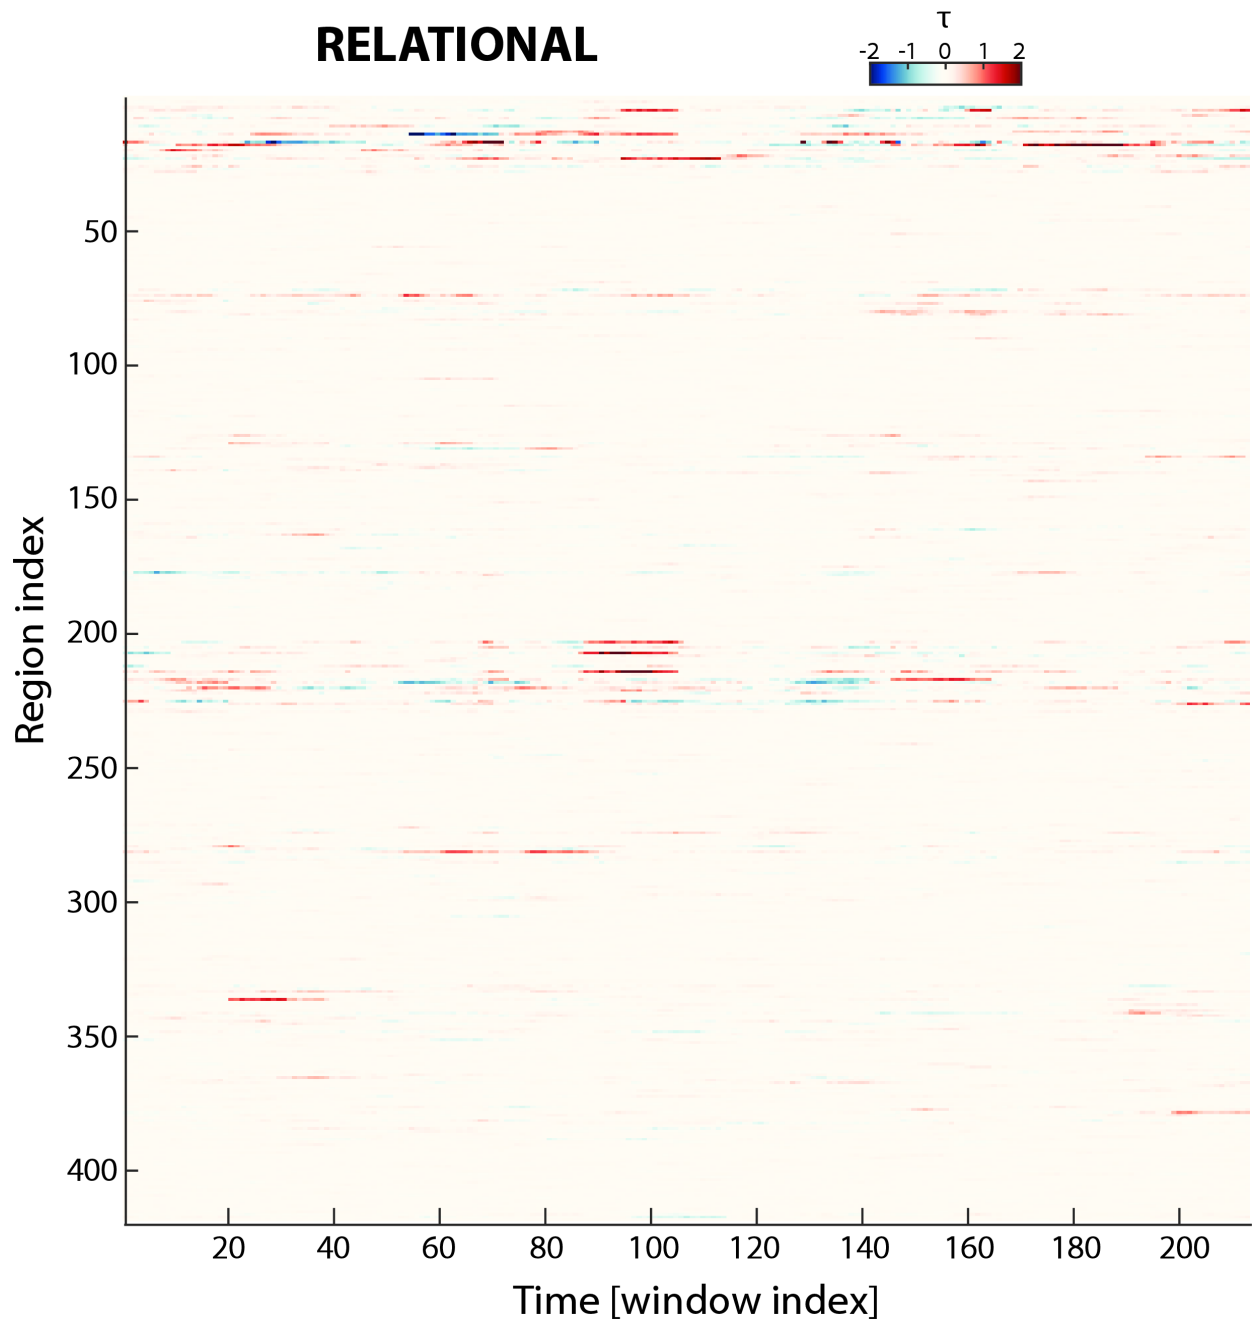

Figure 7: Evolution of causal effects during the relational task.

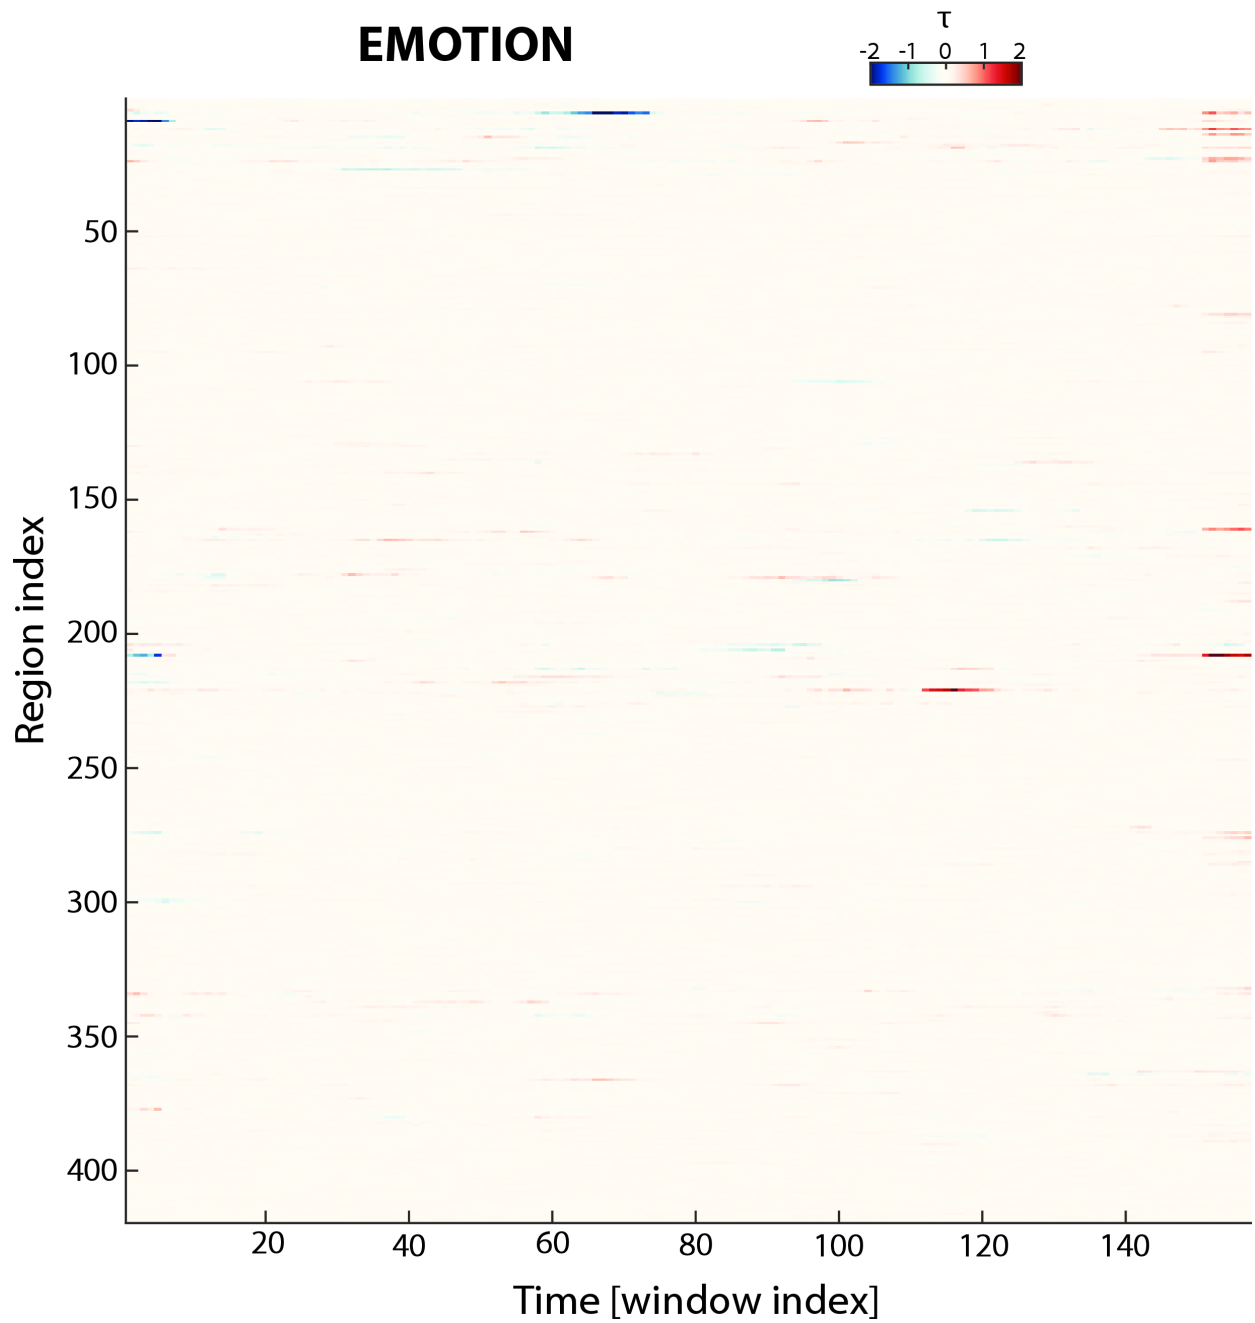

Figure 8: Evolution of causal effects during the emotion task.



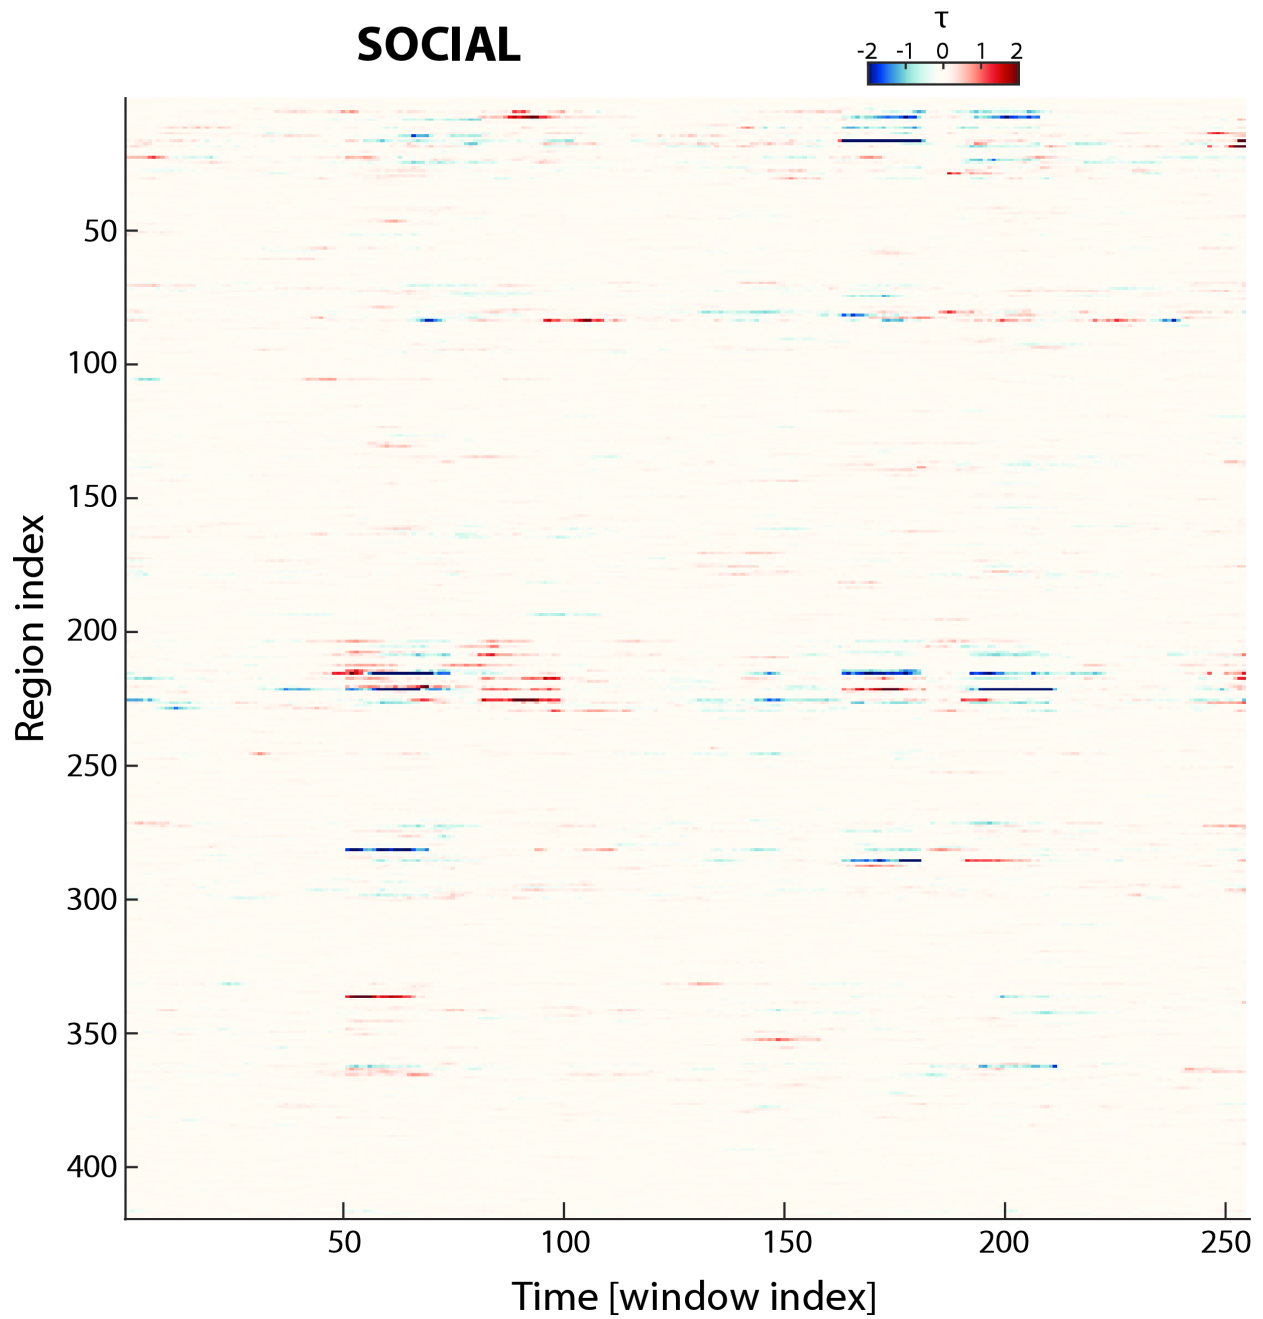

Figure 9: Evolution of causal effects during the social task.

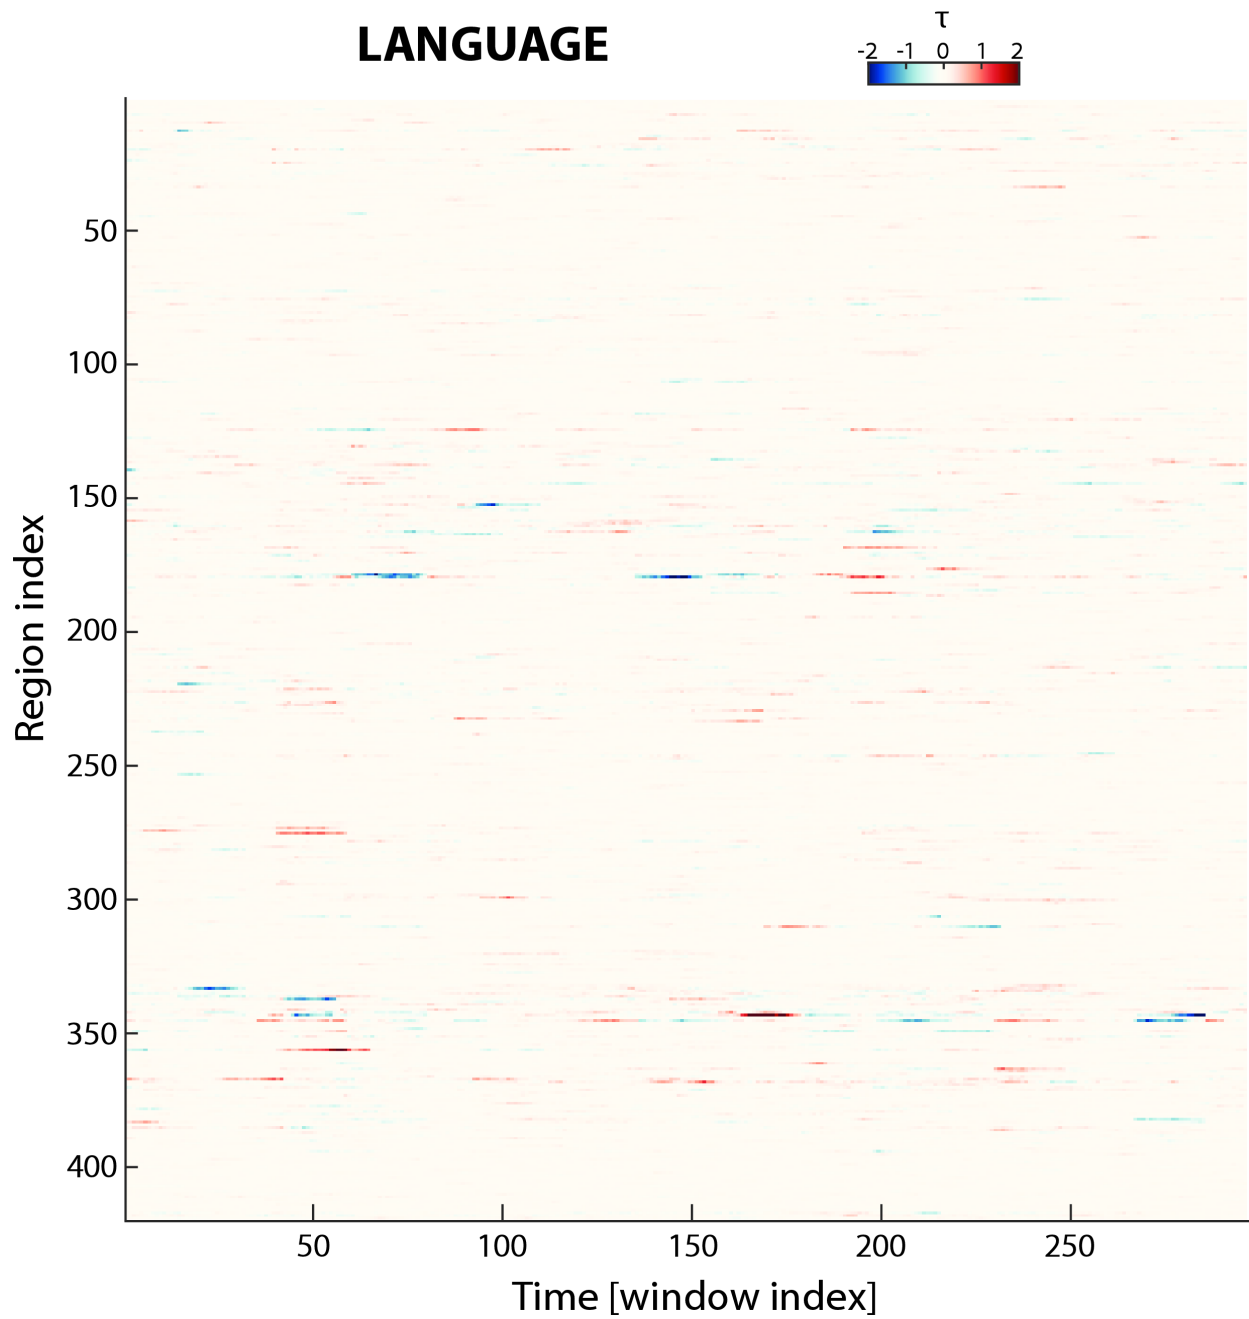

Figure 10: Evolution of causal effects during the language task.

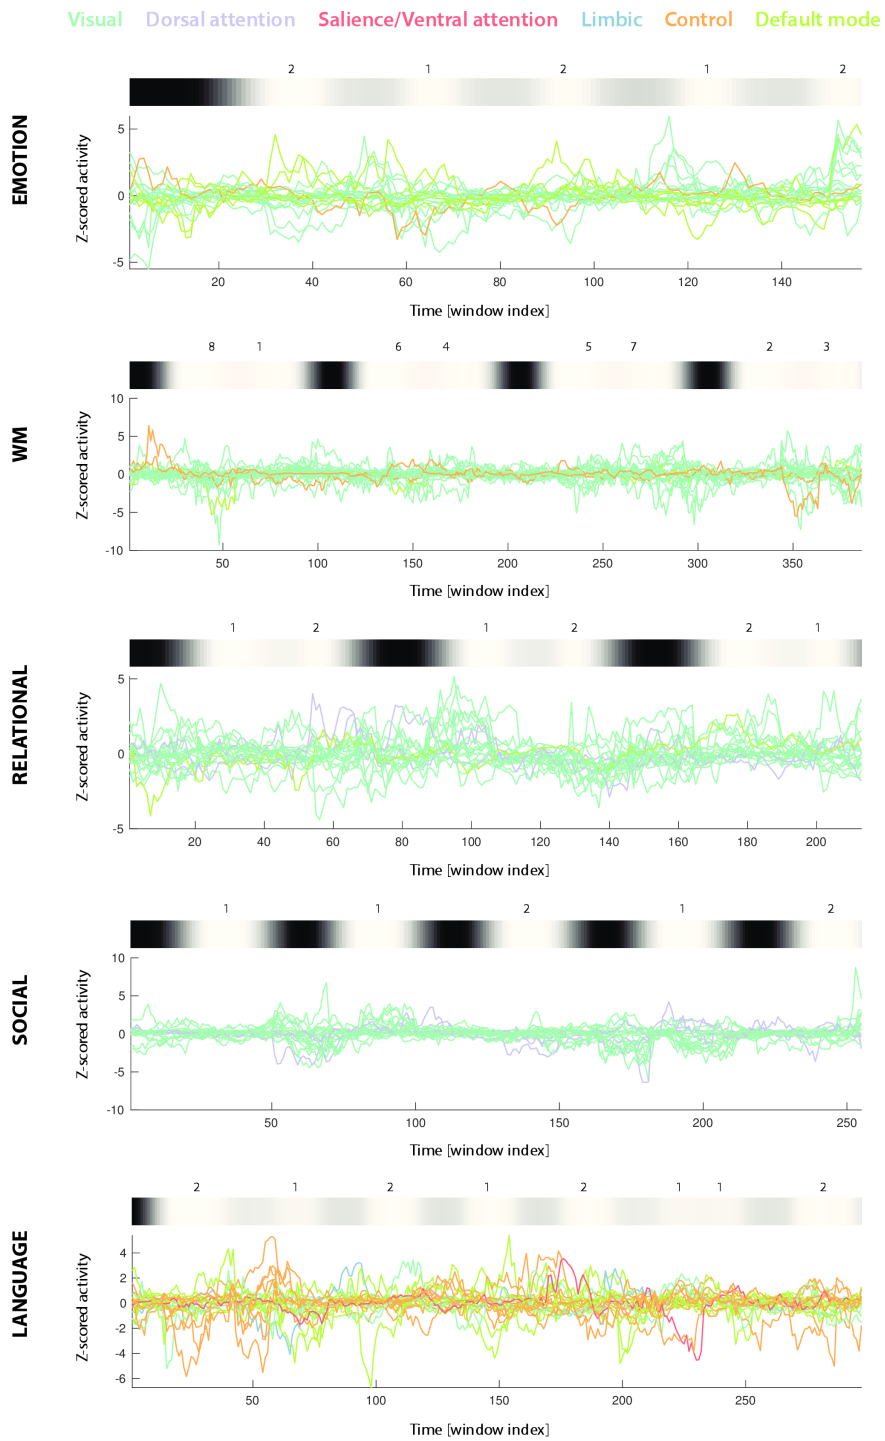

Figure 11: Fluctuations of AoT strength upon sliding window analysis for the emotion, working memory (WM), relational, social and language tasks are shown for the top 20 most dynamic brain regions. For each task, a paradigm time course (convolved with the hemodynamic response function and subsequently averaged in sliding window fashion) is also provided, with the numbers above it denoting epoch type (control condition *versus* actual condition for all except the WM task, in which there were two intermingled factors: 0-back *versus* 2-back task, and presentation of faces, tools, places and body parts). Regional time courses are temporally z-scored, and their color depicts network assignment as summarized at the top of the figure.

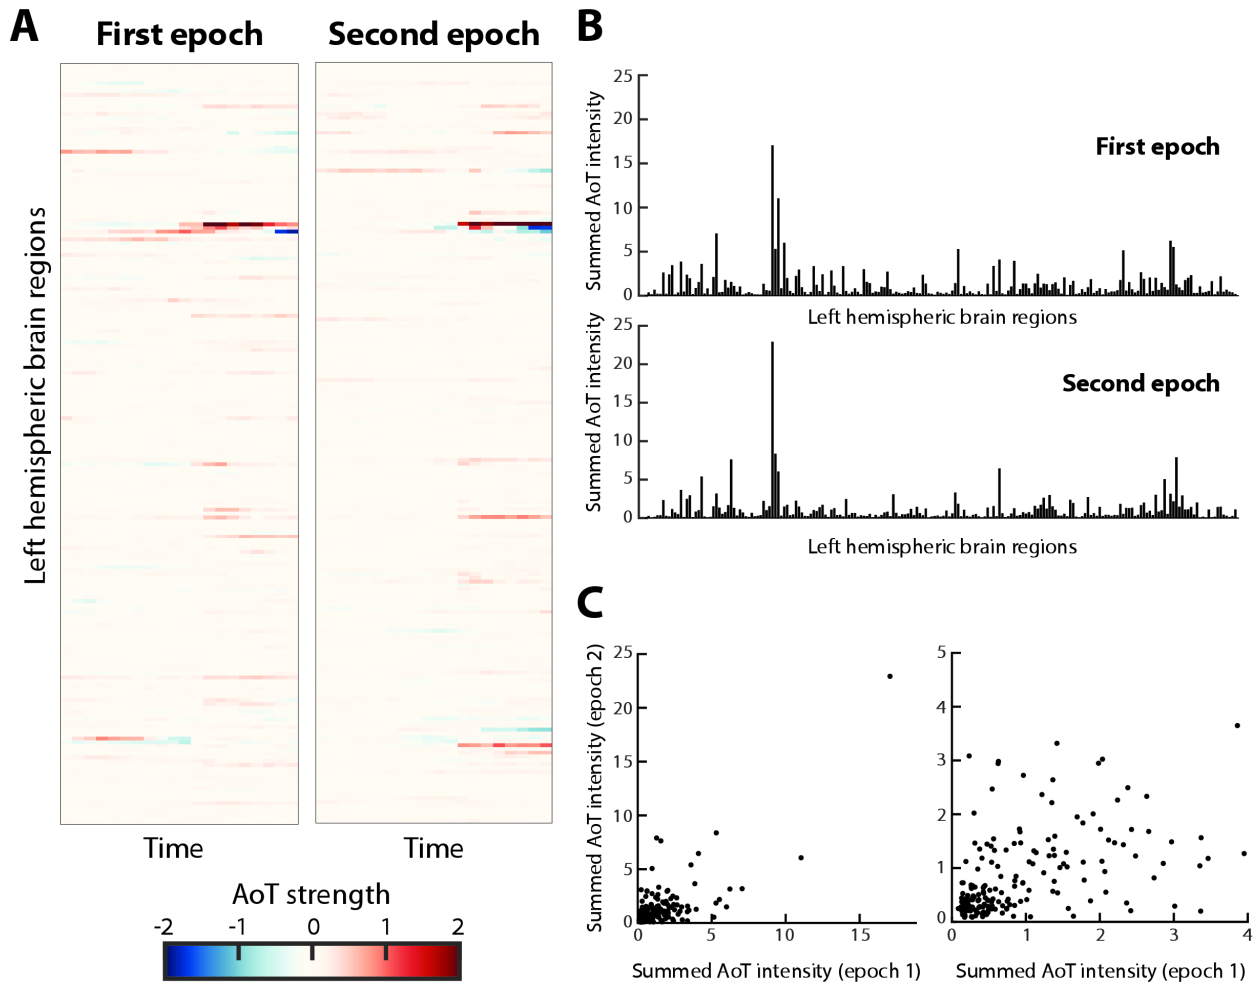

Figure 12: *A* - Comparison of AoT time courses in left hemispheric regions during the entry in the first (left) or second (right) tongue movement epoch. *B* - For the first (top) or second (bottom) epoch of tongue movement, summed AoT intensity (*i.e.*, sum of absolute-valued AoT strength within the examined temporal interval) across brain regions. *C* - Full (left) and zoomed (right) scatter plot representations of the same data, where each data point stands for one brain region.

151 *Impacts of run and (pre)processing choices on AoT patterns*

152 We performed additional analyses, for each of the investigated paradigms, in order to gauge  
 153 the robustness of our findings to adjustments in our (pre)processing pipeline, or to the use of other  
 154 input data. The assessed alternatives were the following:

- 155 1. The use of the right-left phase encoding direction recording as input data (*Run* variable)
- 156 2. The absence of global signal regression in preprocessing (*GSR* variable)
- 157 3. Instead of no censoring (case I), scrubbing of the preprocessed time courses (at a threshold of  
 158 0.5 mm framewise displacement<sup>20</sup>), removing only flagged samples (case II), also one sample  
 159 before and two after each excised time point (case III), or three samples beforehand and six  
 160 afterwards (case IV)
- 161 4. A different sampling scheme for the data points that enter  $\tau$  computations, where instead of  
 162 retaining all data points for a given subject (case I),  $\frac{n_s^*}{S}$  samples were selected per subject  
 163 taking the first available ones (case II), randomly picking them within the full recording (case  
 164 III), or extracting a continuous block (notwithstanding excised volumes, if applicable) from  
 165 a random starting location (case IV)
- 166 5. Another AoT measure, where non-normality is quantified using the Kullback-Leibler diver-  
 167 gence between the error distribution of interest and a standard normal one (*Measure* variable)
- 168 6. For time-locked task paradigms, we also examined the differences between the use of full  
 169 recordings, or of only task epochs (*Epochs* variable).

170 Stability of the results was quantified by Pearson’s correlation coefficient between the AoT  
 171 regional patterns obtained in each setting. To assess the impact of a given variable, we quantified

|                | RS          | MOTOR       | WM          | EMOTION     | SOCIAL      | LANGUAGE    |
|----------------|-------------|-------------|-------------|-------------|-------------|-------------|
| <i>Epochs</i>  | n.a.        | 0.67 ± 0.07 | 0.38 ± 0.31 | 0.62 ± 0.11 | 0.41 ± 0.18 | 0.8 ± 0.09  |
| <i>GSR</i>     | 0.37 ± 0.09 | 0.36 ± 0.09 | 0.45 ± 0.39 | 0.24 ± 0.13 | 0.58 ± 0.29 | 0.3 ± 0.07  |
| <i>Measure</i> | 0.75 ± 0.03 | 0.81 ± 0.04 | 0.75 ± 0.08 | 0.7 ± 0.07  | 0.81 ± 0.08 | 0.77 ± 0.05 |
| <i>Run</i>     | 0.19 ± 0.07 | 0.19 ± 0.11 | 0.42 ± 0.29 | 0.15 ± 0.11 | 0.5 ± 0.28  | 0.19 ± 0.06 |

Table 1: Similarity between cases including the removal of baseline epochs or not, including global signal regression or not, considering a kurtosis-based or a Kullback-Leibler divergence-based AoT-sensitive metric, and assessing the left-right or right-left phase encoding run. Results are presented as mean ± standard deviation. RS: resting state, WM: working memory.

|           | RS              | MOTOR           | WM              | EMOTION         | SOCIAL          | LANGUAGE        |
|-----------|-----------------|-----------------|-----------------|-----------------|-----------------|-----------------|
| I vs II   | $0.74 \pm 0.14$ | $0.89 \pm 0.09$ | $0.87 \pm 0.13$ | $0.87 \pm 0.14$ | $0.92 \pm 0.09$ | $0.83 \pm 0.12$ |
| I vs III  | $0.74 \pm 0.18$ | $0.94 \pm 0.06$ | $0.9 \pm 0.12$  | $0.93 \pm 0.08$ | $0.95 \pm 0.07$ | $0.88 \pm 0.1$  |
| I vs IV   | $0.75 \pm 0.18$ | $0.94 \pm 0.06$ | $0.91 \pm 0.11$ | $0.93 \pm 0.08$ | $0.95 \pm 0.08$ | $0.88 \pm 0.11$ |
| II vs III | $0.73 \pm 0.15$ | $0.89 \pm 0.09$ | $0.88 \pm 0.12$ | $0.87 \pm 0.14$ | $0.92 \pm 0.09$ | $0.84 \pm 0.12$ |
| II vs IV  | $0.73 \pm 0.15$ | $0.89 \pm 0.09$ | $0.88 \pm 0.11$ | $0.87 \pm 0.14$ | $0.92 \pm 0.09$ | $0.83 \pm 0.12$ |
| III vs IV | $0.75 \pm 0.18$ | $0.94 \pm 0.06$ | $0.91 \pm 0.11$ | $0.93 \pm 0.08$ | $0.94 \pm 0.08$ | $0.89 \pm 0.1$  |

Table 2: Similarity between different motion censoring schemes: no scrubbing (I), mild scrubbing (II), moderate scrubbing (III) and aggressive scrubbing (IV). Results are presented as mean  $\pm$  standard deviation. RS: resting state, WM: working memory.

172 similarity when only this particular factor was varied, while all others were kept fixed. This yielded  
173 64 values per variable, which we summarize below in terms of mean and standard deviation.

174 As can be seen from Table 1, regardless of the paradigm, both our original kurtosis-based  
175 measure and our alternative revolving around the Kullback-Leibler divergence yielded highly similar  
176 AoT patterns. The removal of baseline epochs had the largest influence on the social and working  
177 memory tasks. Whether to include global signal regression or not had a consistently sizeable effect  
178 in all paradigms, and so did selecting the first or the second available run.

179 From Table 2, it can be seen that AoT estimates remain extremely similar regardless of the  
180 extent of scrubbing applied to the data. This is strong evidence that head motion does not impact  
181 our results.

182 In Table 3, most sampling schemes can be seen to yield highly similar results, to the exception  
183 of case III (selection of the first time points for a given subject). This may be due to magnetization  
184 effects, or to physiological variables that would require a certain time to reach a steady state and

|           | RS              | MOTOR           | WM              | EMOTION         | SOCIAL          | LANGUAGE        |
|-----------|-----------------|-----------------|-----------------|-----------------|-----------------|-----------------|
| I vs II   | $0.59 \pm 0.1$  | $0.9 \pm 0.07$  | $0.85 \pm 0.12$ | $0.9 \pm 0.08$  | $0.9 \pm 0.11$  | $0.81 \pm 0.09$ |
| I vs III  | $0.26 \pm 0.11$ | $0.29 \pm 0.17$ | $0.29 \pm 0.3$  | $0.32 \pm 0.18$ | $0.5 \pm 0.22$  | $0.29 \pm 0.13$ |
| I vs IV   | $0.59 \pm 0.11$ | $0.81 \pm 0.08$ | $0.82 \pm 0.15$ | $0.75 \pm 0.1$  | $0.86 \pm 0.12$ | $0.75 \pm 0.08$ |
| II vs III | $0.26 \pm 0.13$ | $0.27 \pm 0.18$ | $0.3 \pm 0.32$  | $0.32 \pm 0.18$ | $0.51 \pm 0.21$ | $0.28 \pm 0.14$ |
| II vs IV  | $0.61 \pm 0.1$  | $0.81 \pm 0.08$ | $0.83 \pm 0.14$ | $0.75 \pm 0.1$  | $0.85 \pm 0.13$ | $0.74 \pm 0.08$ |
| III vs IV | $0.24 \pm 0.13$ | $0.16 \pm 0.19$ | $0.3 \pm 0.32$  | $0.31 \pm 0.19$ | $0.44 \pm 0.24$ | $0.18 \pm 0.13$ |

Table 3: Similarity between different sampling schemes: all data for a subject (I), first samples per subject only (II), randomly selected samples per subject (III) and continuous block with random start per subject (IV). Results are presented as mean  $\pm$  standard deviation. RS: resting state, WM: working memory.

185 would initially perturb the fMRI signals (*e.g.*, stronger heart rate fluctuations until one becomes  
186 at ease in the scanner).

187 In addition to the above, we also verified that the results were not affected by the use of a  
188 coarser ( $R_2 = 219$  regions) or finer-grained ( $R_3 = 819$  regions) atlas. As can be seen from Fig. 13,  
189 the extracted AoT patterns in the resting state and motor task cases remained similar regardless  
190 of atlas granularity.

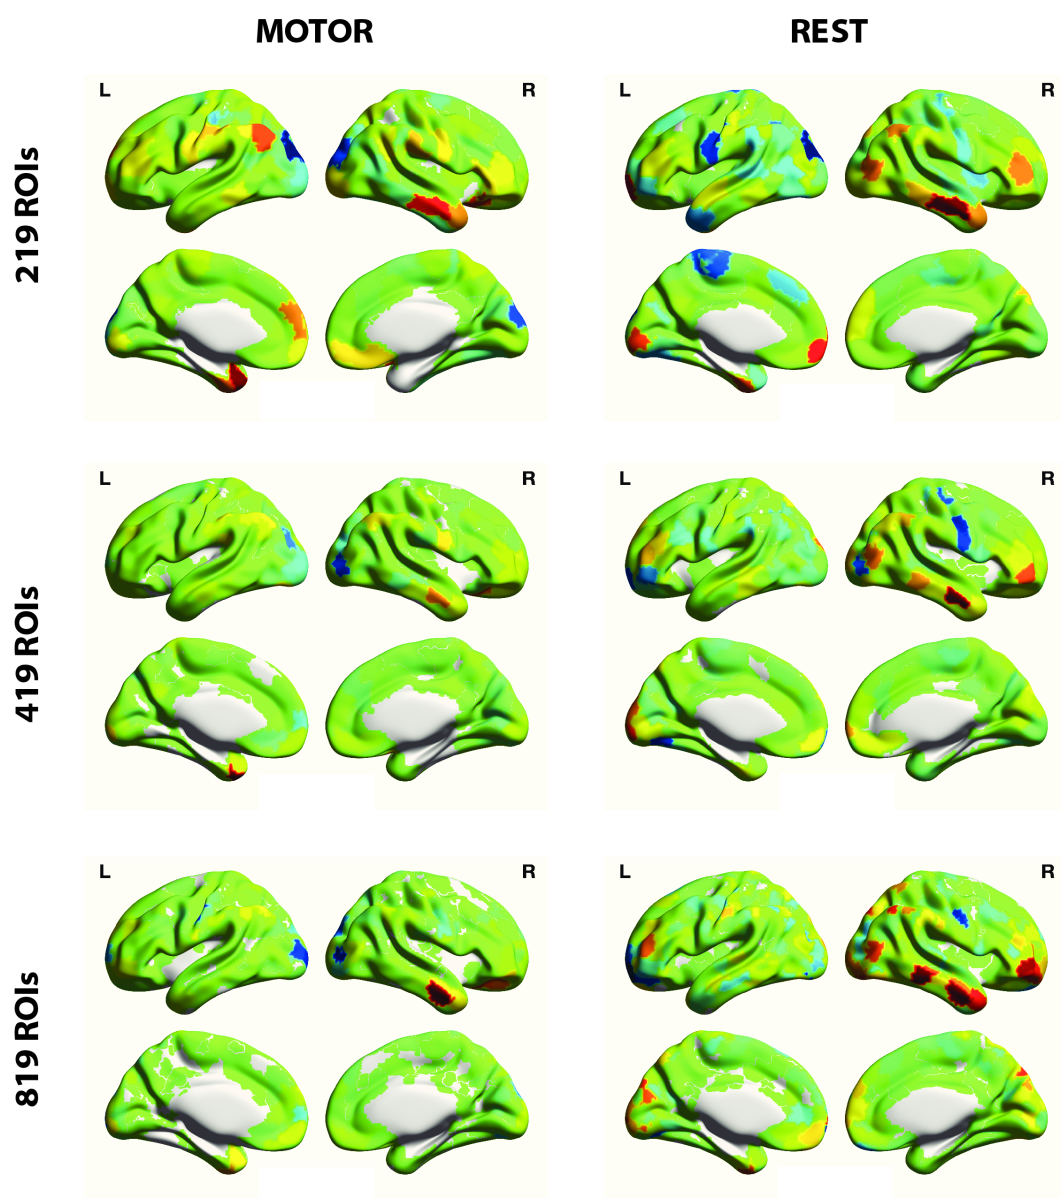

Figure 13: Regional AoT patterns obtained for the resting state and motor paradigms, using  $n_s^* = 8000$  samples, when resorting to an atlas with 219, 419 or 819 regions of interest. ROI: region of interest.



191 *Differences in effects captured by our approach, Granger causality and LiNGAM*

192 To explore the similarities and differences between the results of LiNGAM, Granger causality  
 193 and our approach, we downscaled the dimensionality of our data from  $R = 419$  regions to 15  
 194 networks (the 7 Yeo networks<sup>21</sup> for each hemisphere, plus subcortical regions). We estimated pa-  
 195 rameters for each method using 56000 samples, a high enough number to ensure accurate outcomes,  
 196 and performed bootstrapping over 50 folds that included different subsets of subjects each time.

197 For LiNGAM, we extracted the output set of causal coefficients following estimation and pruning  
 198 ( $\mathbf{B} \in \mathbb{R}^{R \times R}$ ), using a dedicated toolbox<sup>22</sup>. For Granger causality, we extracted the set of coefficients  
 199 obtained upon fitting a first-order autoregressive model to the forward time courses (having set  
 200 to zero the coefficients denoting the influence of a network onto itself), which we will refer to as  
 201  $\tilde{\mathbf{A}}^f \in \mathbb{R}^{R \times R}$ . Finally, for our method, we computed  $\tau \in \mathbb{R}^{R \times 1}$  following Eqs. (1)-(2). To compare  
 202 the outputs despite their different dimensionalities, we computed the in-degree and out-degree  
 203 vectors from  $\mathbf{B}$  and  $\tilde{\mathbf{A}}^f$ . For this purpose, for simplicity, we considered absolute-valued causal  
 204 coefficients.

205 Median output causal coefficients across folds for LiNGAM are shown in Fig. 14A: while the  
 206 presence of many null coefficients confirms robustness of the approach across folds, the matrix is  
 207 far from being lower triangular, because LiNGAM’s assumption of an acyclic graph does not apply  
 208 to the fMRI data at hand. In Fig. 14B, a similar representation is shown for Granger causality  
 209 coefficients; one can notice strong diagonal patterns reflective of cross-hemispheric interactions

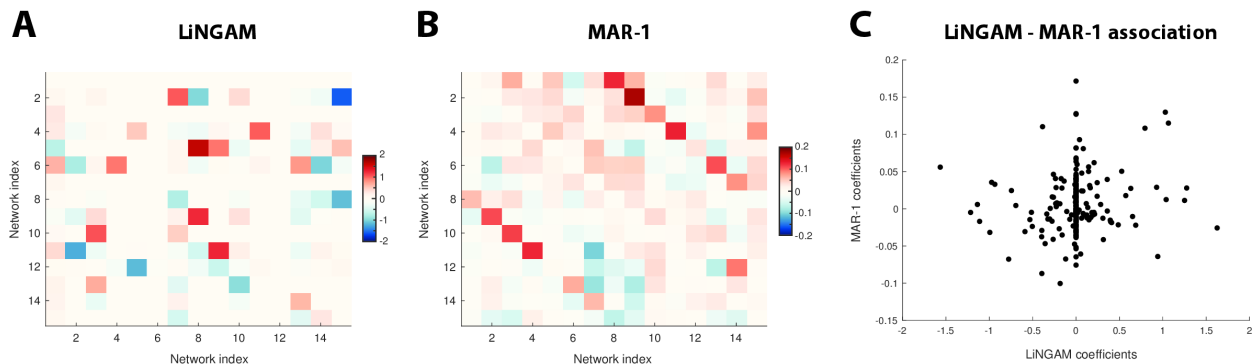

Figure 14: For LiNGAM (A) and a first-order multivariate autoregressive model reflective of Granger causality analysis (MAR-1, B), median causal coefficients across 50 folds. C - Relationship between median coefficients across both approaches.

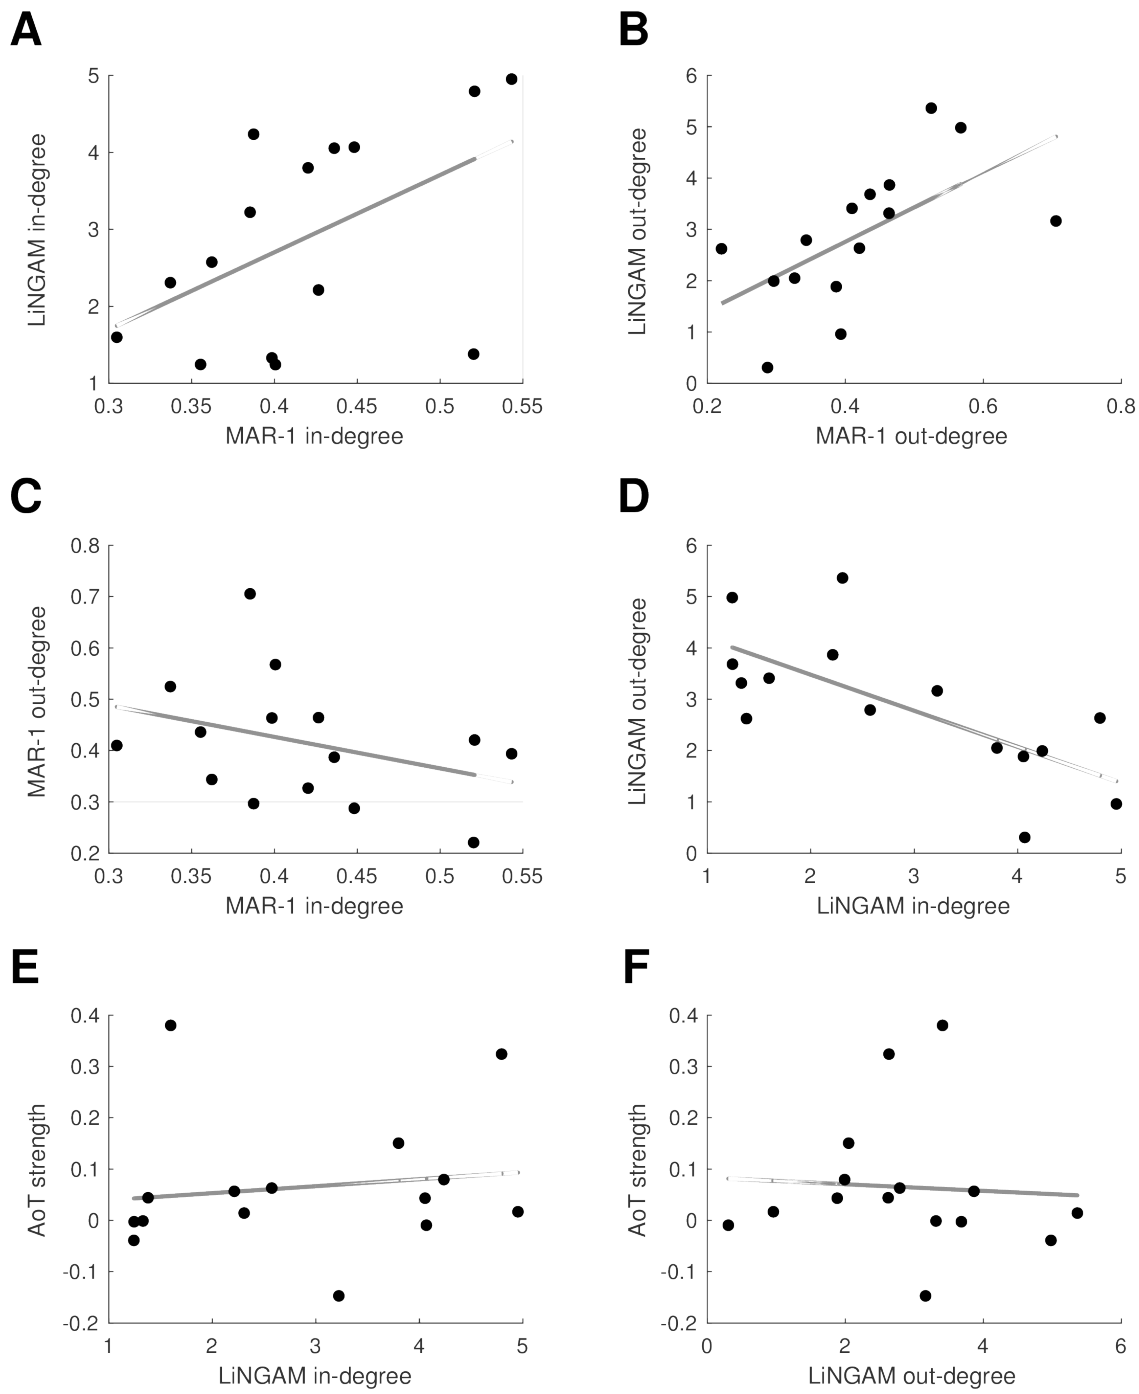

Figure 15: Scatter plots and linear fits for relationships between the features extracted from LiNGAM, Granger causality analysis (based on a first-order multivariate autoregressive model, MAR-1), and our AoT-sensitive metric.

210 (networks 1 to 7 with networks 8 to 14). Causal coefficients were not correlated across cases  
 211 (Pearson's correlation:  $R = 0.127$ ,  $p = 0.057$ ; see also Fig. 14C).

212 Scatter plots depicting the relationships between in-degree and out-degree vectors for the  
213 LiNGAM and Granger causality cases, as well as  $\tau$  extracted with our approach, are displayed  
214 in Fig. 15. There was a strong negative correlation between the in-degree and out-degree vectors  
215 for the LiNGAM case ( $R = -0.62$ ,  $p = 0.015$ ) and to a milder extent, albeit not significantly,  
216 for the multivariate autoregressive model case ( $R = -0.35$ ,  $p = 0.21$ ). Thus, as seen from both  
217 methodologies, networks that tend to causally regulate others will not be so strongly modulated  
218 themselves, and *vice versa*.

219 There were also moderate, but non-significant similarities between the LiNGAM and multivari-  
220 ate autoregressive approaches: across methods, correlation for in-degree and out-degree vectors  
221 was  $R = 0.49$ ,  $p = 0.066$  and  $R = 0.28$ ,  $p = 0.31$ , respectively. When comparing LiNGAM-  
222 extracted features with the outputs from our approach, correlation also did not reach significance  
223 ( $R = -0.07$ ,  $p = 0.81$  for in-degree and  $R = 0.19$ ,  $p = 0.49$  for out-degree, respectively), and the  
224 same was seen when comparing Granger causality features to  $\tau$  ( $R = -0.37$ ,  $p = 0.18$  for in-degree  
225 and  $R = -0.01$ ,  $p = 0.97$  for out-degree, respectively).

226 All in all, LiNGAM, Granger causality and our AoT-sensitive metric thus capture different  
227 facets of fMRI activity, an expected finding given the differences between the three approaches.

## References

- [1] Barch, D.M., Burgess, G.C., Harms, M.P., Petersen, S.E., Schlaggar, B.L., Corbetta, M., et al. Function in the human connectome: task-fMRI and individual differences in behavior. *Neuroimage* 2013;80:169–89. doi:[10.1016/j.neuroimage.2013.05.033](https://doi.org/10.1016/j.neuroimage.2013.05.033).
- [2] Kim, C., Kroger, J.K., Calhoun, V.D., Clark, V.P.. The role of the frontopolar cortex in manipulation of integrated information in working memory. *Neuroscience letters* 2015;595:25–29.
- [3] Alnæs, D., Sneve, M.H., Richard, G., Skåtun, K.C., Kaufmann, T., Nordvik, J.E., et al. Functional connectivity indicates differential roles for the intraparietal sulcus and the superior parietal lobule in multiple object tracking. *Neuroimage* 2015;123:129–137.
- [4] Xu, Y.. The role of the superior intraparietal sulcus in supporting visual short-term memory for multifeature objects. *Journal of Neuroscience* 2007;27(43):11676–11686.
- [5] Christoff, K., Prabhakaran, V., Dorfman, J., Zhao, Z., Kroger, J.K., Holyoak, K.J., et al. Rostrolateral prefrontal cortex involvement in relational integration during reasoning. *Neuroimage* 2001;14(5):1136–1149.
- [6] Farrer, C., Frey, S.H., Van Horn, J.D., Tunik, E., Turk, D., Inati, S., et al. The angular gyrus computes action awareness representations. *Cerebral cortex* 2008;18(2):254–261.
- [7] Guidali, G., Pisoni, A., Bolognini, N., Papagno, C.. Keeping order in the brain: the supramarginal gyrus and serial order in short-term memory. *Cortex* 2019;119:89–99.
- [8] Martinez-Trujillo, J.C., Cheyne, D., Gaetz, W., Simine, E., Tsotsos, J.K.. Activation of area mt/v5 and the right inferior parietal cortex during the discrimination of transient direction changes in translational motion. *Cerebral Cortex* 2007;17(7):1733–1739.
- [9] Hartwright, C.E., Apperly, I.A., Hansen, P.C.. Representation, control, or reasoning? distinct functions for theory of mind within the medial prefrontal cortex. *Journal of Cognitive Neuroscience* 2014;26(4):683–698.
- [10] Fletcher, P.C., Happe, F., Frith, U., Baker, S.C., Dolan, R.J., Frackowiak, R.S., et al. Other minds in the brain: a functional imaging study of “theory of mind” in story comprehension. *Cognition* 1995;57(2):109–128.
- [11] Theiler, J., Eubank, S., Longtin, A., Galdrikian, B., Farmer, J.D.. Testing for nonlinearity in time series: the method of surrogate data. *Physica D: Nonlinear Phenomena* 1992;58(1):77–94.
- [12] Yuan, Z., Qin, W., Wang, D., Jiang, T., Zhang, Y., Yu, C.. The salience network contributes to an individual’s fluid reasoning capacity. *Behavioural brain research* 2012;229(2):384–390.
- [13] Sobczak-Edmans, M., Ng, T., Chan, Y., Chew, E., Chuang, K.H., Chen, S.H.A.. Temporal dynamics of visual working memory. *NeuroImage* 2016;124:1021–1030.
- [14] Blondin, F., Lepage, M.. Decrease and increase in brain activity during visual perceptual priming: An fMRI study on similar but perceptually different complex visual scenes. *Neuropsychologia* 2005;43(13):1887–1900.
- [15] Yarkoni, T., Gray, J.R., Chrsatil, E.R., Barch, D.M., Green, L., Braver, T.S.. Sustained neural activity associated with cognitive control during temporally extended decision making. *Cognitive brain research* 2005;23(1):71–84.
- [16] Carlson, J.M., Rubin, D., Mujica-Parodi, L.R.. Lost emotion: disrupted brain-based tracking of dynamic affective episodes in anxiety and depression. *Psychiatry Research: Neuroimaging* 2017;260:37–48.
- [17] Gauthier, B., van Wassenhove, V.. Time is not space: core computations and domain-specific networks for mental travels. *Journal of Neuroscience* 2016;36(47):11891–11903.
- [18] Hooker, C.I., Verosky, S.C., Germine, L.T., Knight, R.T., D’Esposito, M.. Mentalizing about emotion and its relationship to empathy. *Social cognitive and affective neuroscience* 2008;3(3):204–217.
- [19] Benelli, E., Mergenthaler, E., Walter, S., Messina, I., Sambin, M., Buchheim, A., et al. Emotional and cognitive processing of narratives and individual appraisal styles: recruitment of cognitive control networks vs. modulation of deactivations. *Frontiers in Human Neuroscience* 2012;6:239.
- [20] Power, J.D., Barnes, K.A., Snyder, A.Z., Schlaggar, B.L., Petersen, S.E.. Spurious but systematic correlations in functional connectivity MRI networks arise from subject motion. *Neuroimage* 2012;59(3):2142–2154.
- [21] Yeo, B.T.T., Krienen, F.M., Sepulcre, J., Sabuncu, M.R., Lashkari, D., Hollinshead, M., et al. The organization of the human cerebral cortex estimated by intrinsic functional connectivity. *Journal of neurophysiology* 2011;106:1125–1165. doi:[10.1152/jn.00338.2011](https://doi.org/10.1152/jn.00338.2011).
- [22] Shimizu, S., Hoyer, P.O., Hyvarinen, A., Kerminen, A.. A linear non-gaussian acyclic model for causal discovery. *Journal of Machine Learning Research* 2006;7(72):2003–2030. URL: <http://jmlr.org/papers/v7/shimizu06a.html>.
